# Supplementary material for: Amorphous zeolite imidazole framework-derived hierarchically porous and multi-catalytic active site bifunctional catalysts for zinc–air batteries
Source: Royal Society of Chemistry journal article supplement (doi:10.1039/d3cy01042b), 2023-01-01
Supplement: d3cy01042b1.pdf [file d3cy01042b1.pdf]

## Electronic Supplementary Information (ESI)

### Amorphous zeolite imidazole framework derived hierarchically porous, multi-catalytic active site bifunctional catalysts for zinc-air batteries

Supeng Ye, Yunxian Zhang, Fei Lin, Yingjian Huang, Xuelong Zhou, Qixing Wu and Fang Wang\*

*College of Chemistry and Environmental Engineering, Shenzhen University, Shenzhen 518000, Guangdong, China*

\*Corresponding author.

E-mail address: wangfsz@szu.edu.cn (Prof. F. Wang).

**Keywords:** Zinc-air batteries, Bifunctional catalysts, Amorphous ZIFs, CoFe alloy, Hierarchical pores

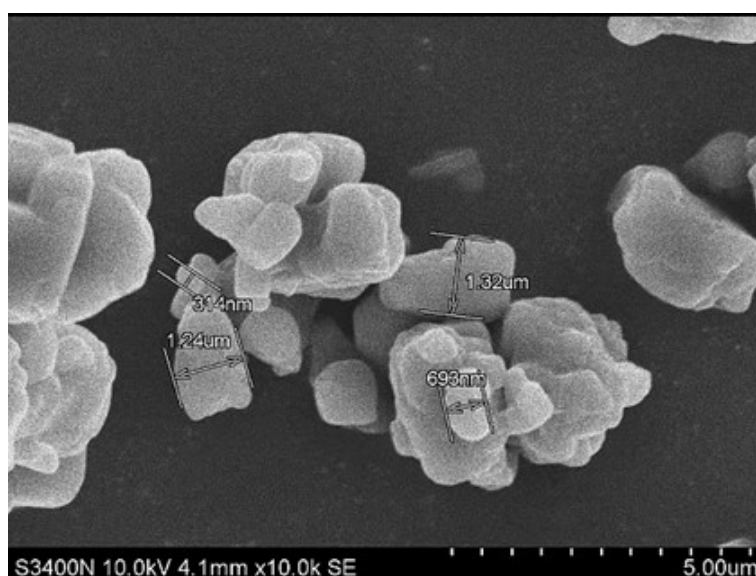

**Fig. S1** SEM images of nanoscale NaCl.

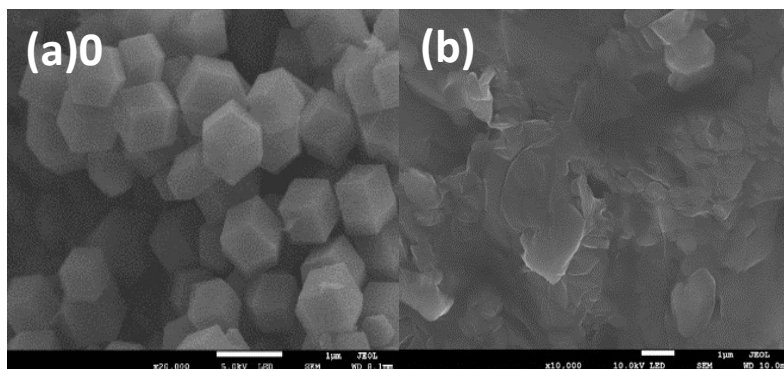

**Fig. S2** SEM images of (a) ZIF-67 and (b) amorphous ZIF-67.

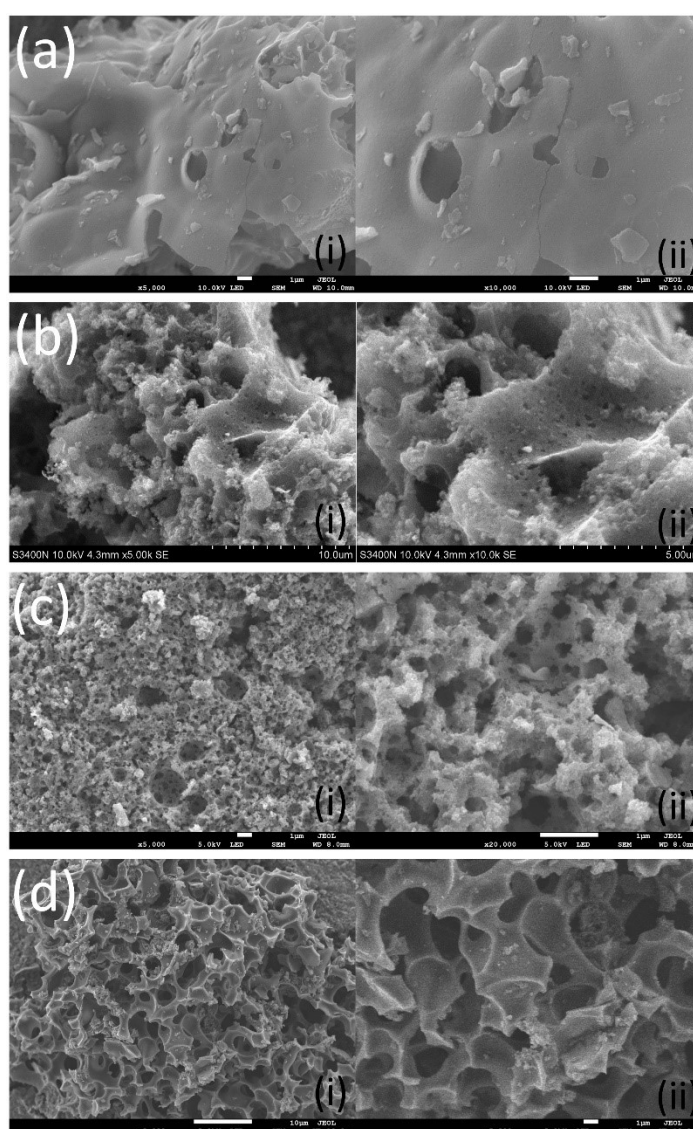

**Fig. S3** FESEM images of HP/CoNC with different addition of NaCl templates: (a) 0 mmol, (b) 0.5 mmol, (c) 0.85 mmol and (d) 1.5 mmol.

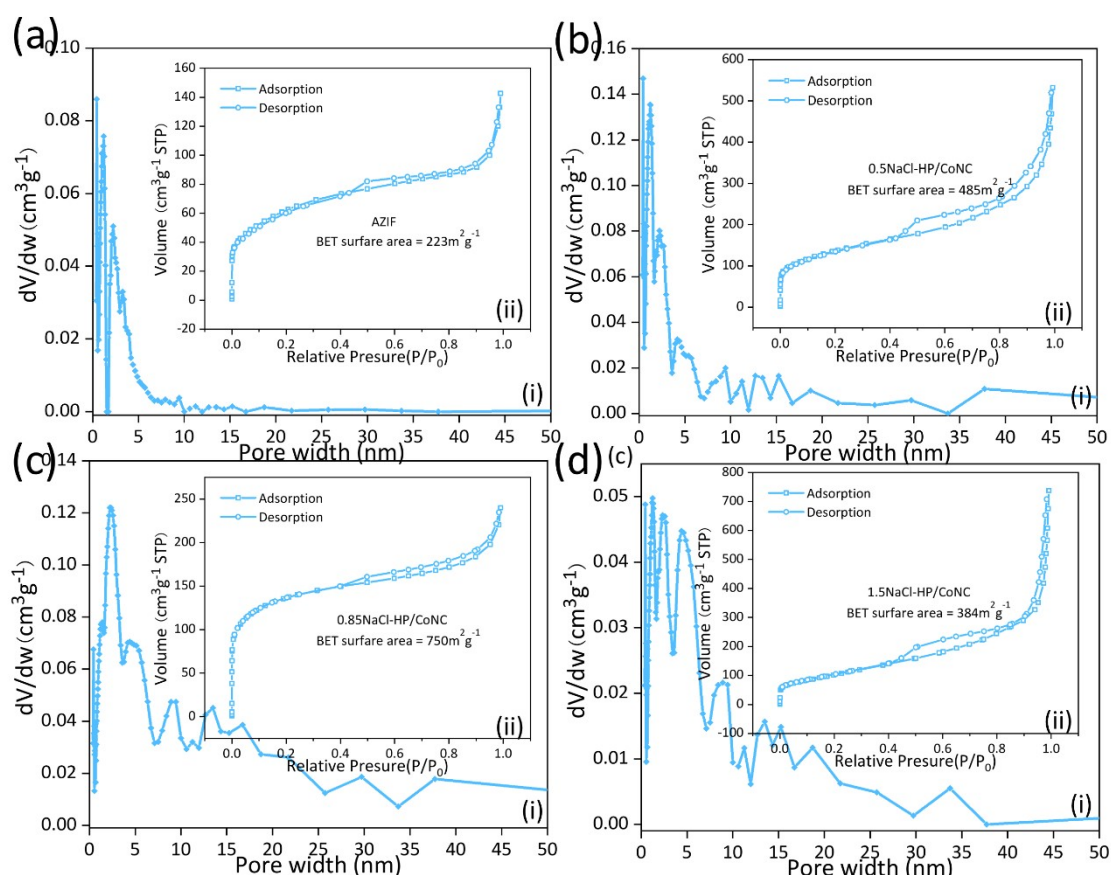

**Fig. S4** N<sub>2</sub> adsorption and desorption curves (ii) and pore size distribution curves (i) of HP/CoNC with different addition of NaCl templates: (a) 0 mmol, (b) 0.5 mmol, (c) 0.85 mmol, (d) 1.5 mmol.

As shown in **Fig. S3 and S4**, the catalyst sample without the addition of NaCl is flat and smooth, showing inapparent porous structure, while the three groups of samples with the addition of NaCl templates appear more obvious porous structure. Among them, the catalyst using 0.85 mmol NaCl templates has evenly and densely distributed macropores and mesopores, which has the largest specific surface area. When 0.5 and 1.5 mmol NaCl was added, neither too little nor excessive templates are favorable for the formation of mesopores, thus 0.85 mmol NaCl was used in our research. So the addition of NaCl templates play a key role in the construction of hierarchical porous structure.

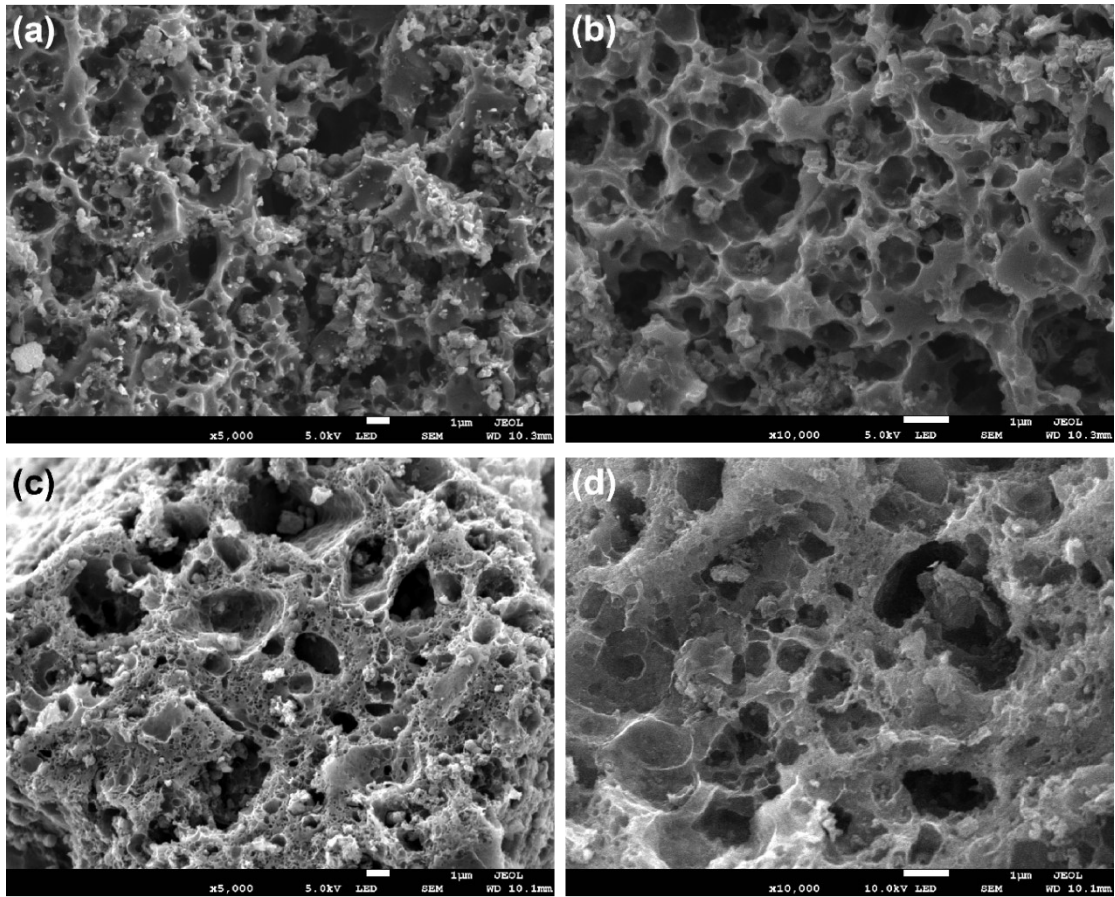

**Fig. S5** SEM images of (a) HP/CoNC, (b) CoFe-1@HP/CoNC, (c) CoFe-2@HP/CoNC and (d) CoFe-3@HP/CoNC.

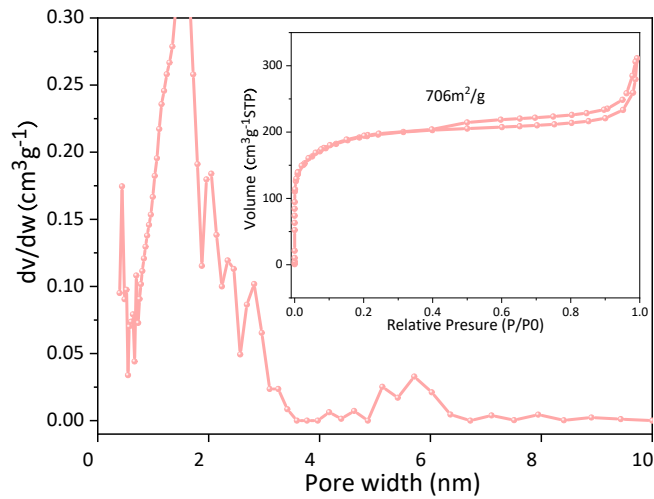

**Fig. S6** N<sub>2</sub> adsorption/desorption isotherms and pore size distribution of CoFe-1@HP/CoNC.

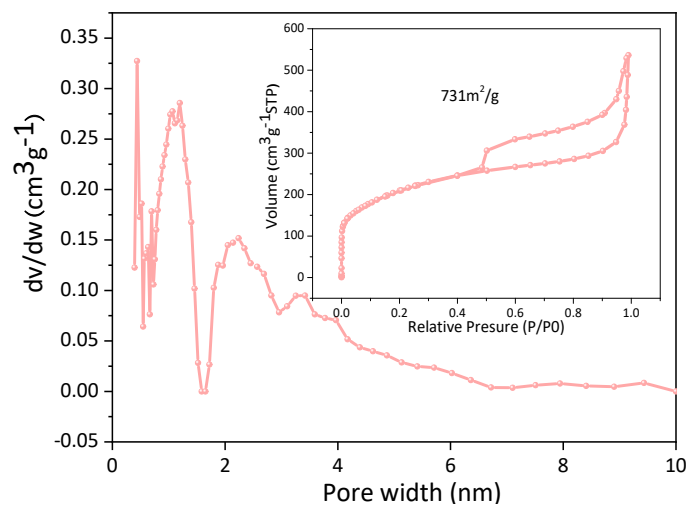

**Fig. S7**  $\text{N}_2$  adsorption/desorption isotherms and pore size distribution of CoFe-3@HP/CoNC.

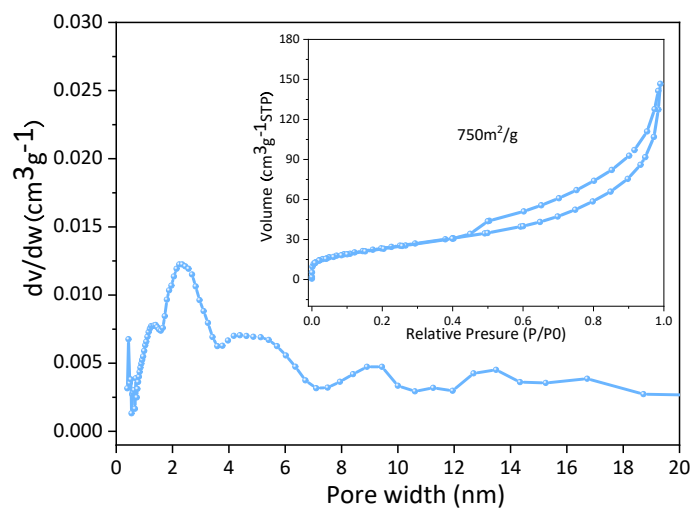

**Fig. S8**  $\text{N}_2$  adsorption/desorption isotherms and pore size distribution of HP/CoNC.

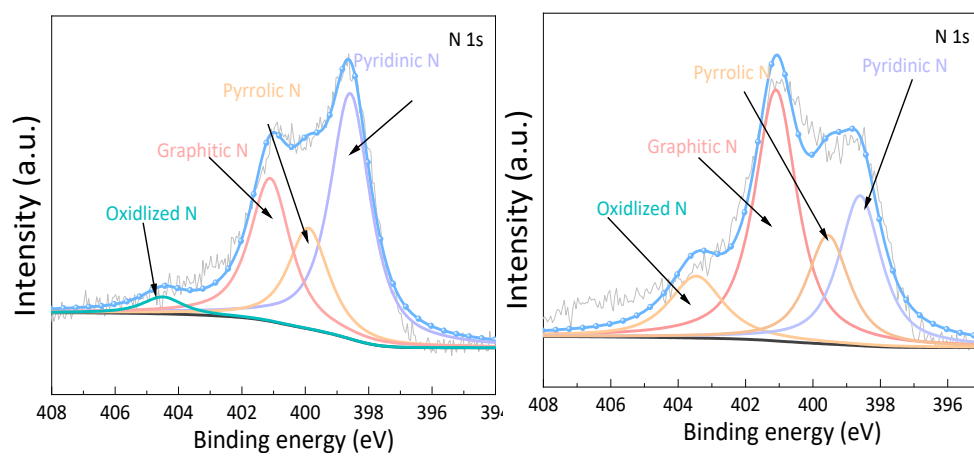

**Fig. S9** N 1s high-resolution XPS spectrum of (a) CoFe-1@HP/CoNC, (b) CoFe-3@HP/CoNC.

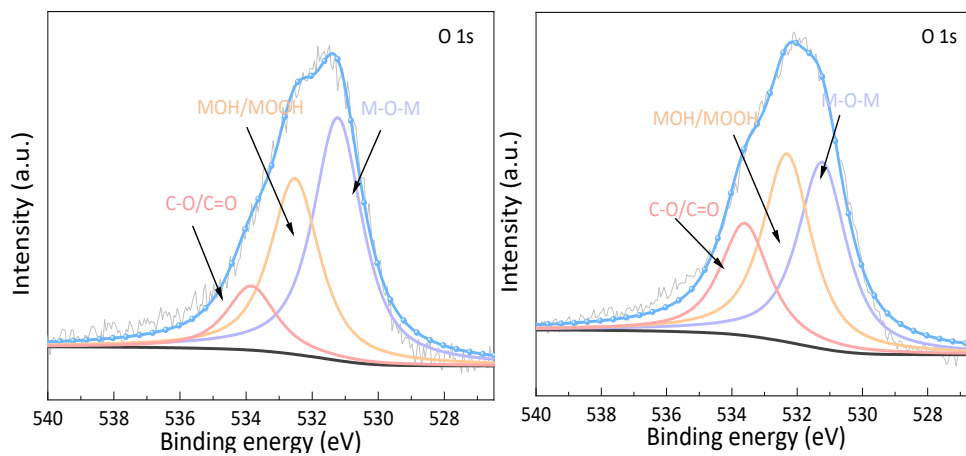

**Fig. S10** O 1s high-resolution XPS spectrum of (a) CoFe-1@HP/CoNC, (b) CoFe-3@HP/CoNC.

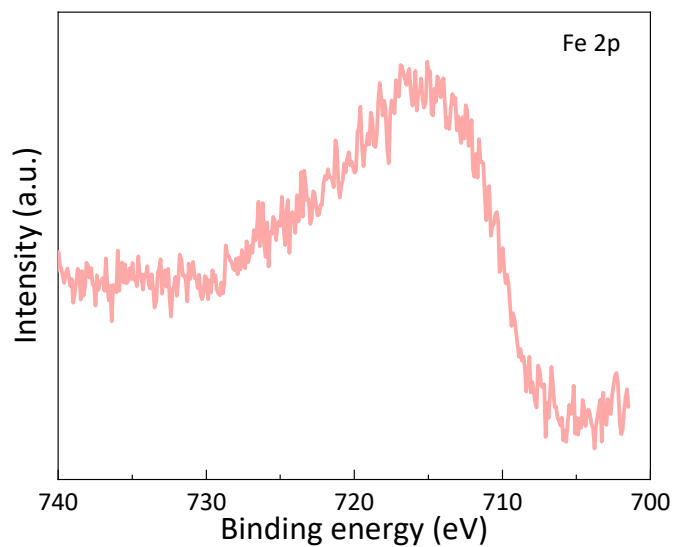

**Fig. S11** High-resolution XPS spectrum of Fe 2p.

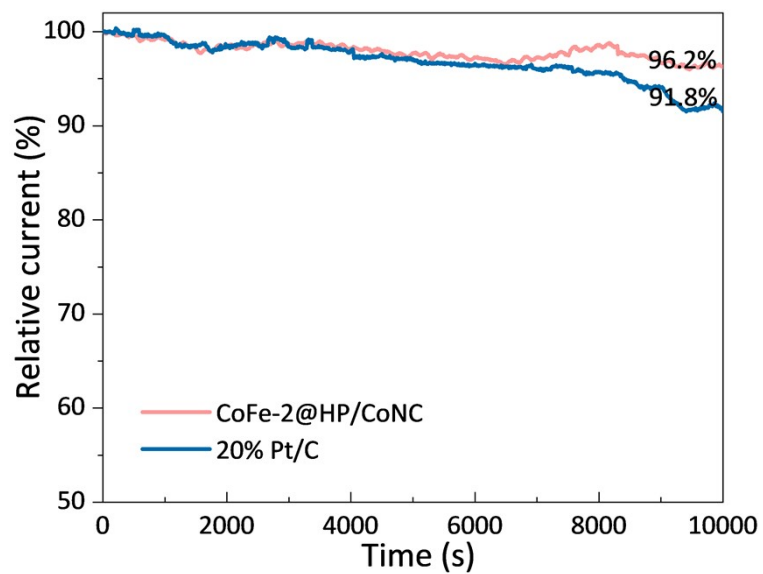

**Fig. S12** Chronoamperometric responses of CoFe-2@HP/CoNC and Pt/C at 0.68V (vs. RHE) in O<sub>2</sub>-saturated 0.1 M KOH.

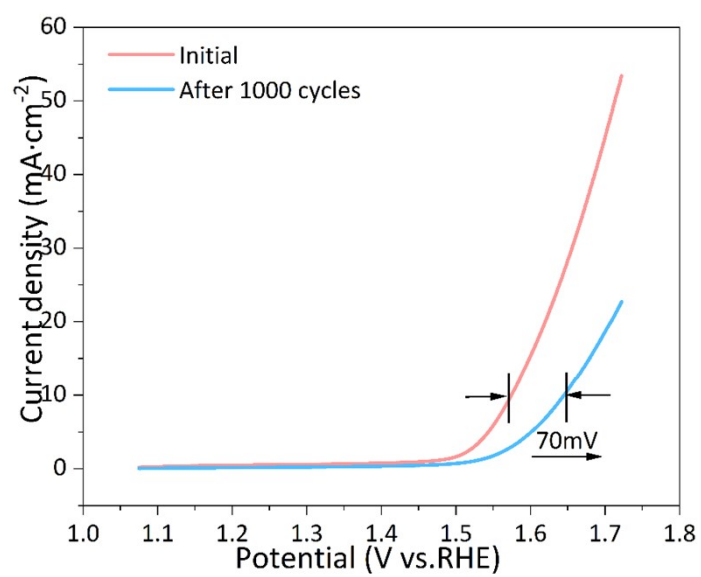

**Fig. S13** Cyclic stability test of IrO<sub>2</sub> in 1 M KOH.

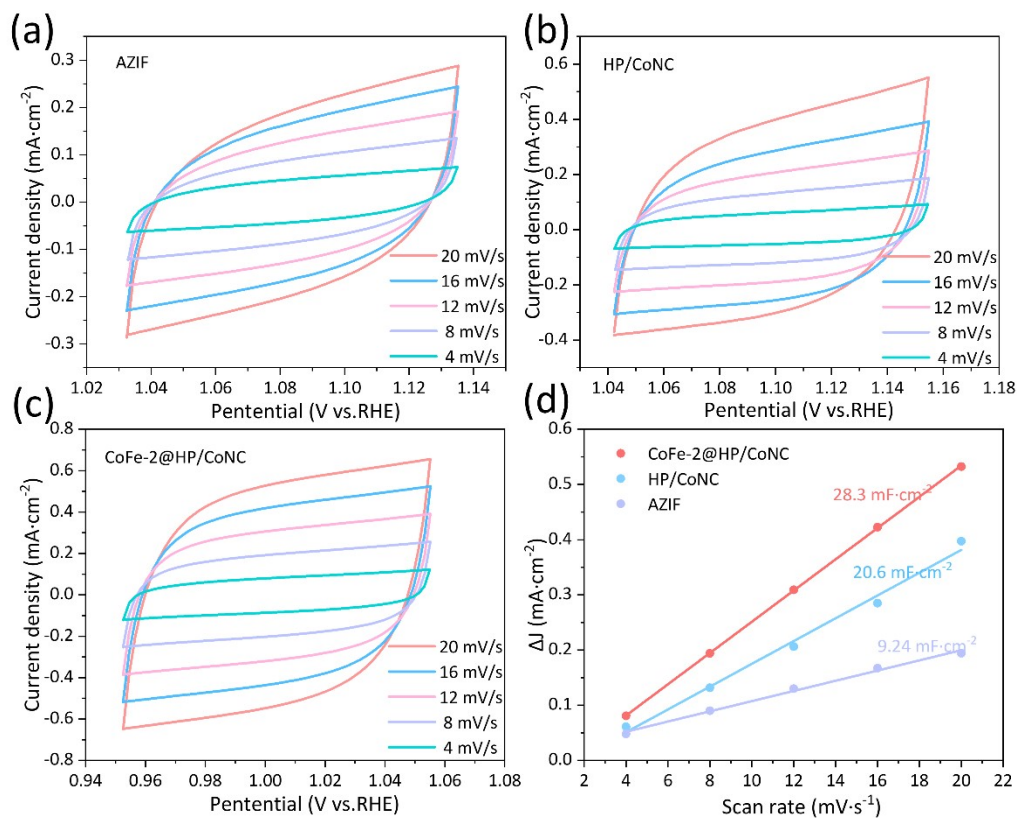

**Fig. S14** CV curves of (a) AZIF, (b) HP/CoNC and (c) CoFe-2@HP/CoNC at different scanning speeds in the non-Faraday voltage range. (d)  $C_{dl}$  of CoFe-2@HP/CoNC, HP/CoNC and AZIF.

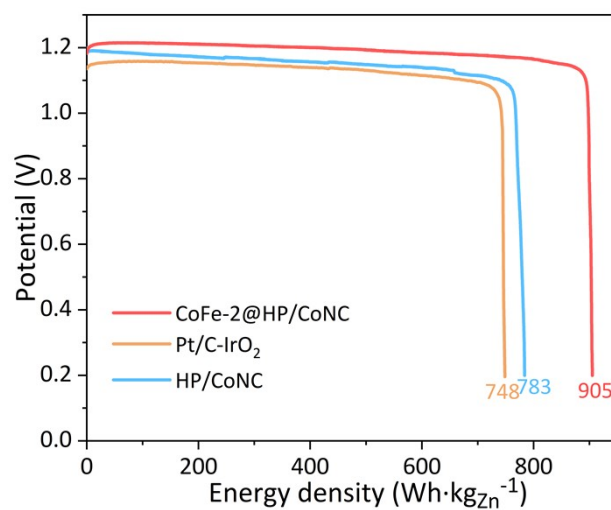

**Fig. S15** Energy density of ZABs normalized to the weight of Zn.



**Table S1** Atomic compositions of the prepared catalysts obtained from XPS spectra.

| <b>samples</b>  | <b>C 1s<br/>(At. %)</b> | <b>N 1s<br/>(At. %)</b> | <b>O 1s<br/>(At. %)</b> | <b>Co 2p<br/>(At. %)</b> | <b>Fe 2p<br/>(At. %)</b> |
|-----------------|-------------------------|-------------------------|-------------------------|--------------------------|--------------------------|
| HP/CoNC         | 84.03                   | 9.60                    | 5.29                    | 1.09                     | 0                        |
| CoFe-1@ HP/CoNC | 83.25                   | 9.20                    | 6.05                    | 1.04                     | 0.45                     |
| CoFe-2@ HP/CoNC | 81.44                   | 9.27                    | 7.46                    | 1.28                     | 0.55                     |
| CoFe-3@ HP/CoNC | 84.92                   | 6.16                    | 7.59                    | 0.70                     | 0.63                     |

**Table S2** A survey of zinc-air batteries assembled by different electrocatalysts.

| Catalyst                    | Open-circuit Voltage (V) | Peak power density ( $\text{mW}\cdot\text{cm}^{-2}$ ) | Specific capacity ( $\text{mAh}\cdot\text{g}_{\text{Zn}}^{-1}$ ) | Stability-Current density ( $\text{mA}\cdot\text{cm}^{-2}$ ) | References                                         |
|-----------------------------|--------------------------|-------------------------------------------------------|------------------------------------------------------------------|--------------------------------------------------------------|----------------------------------------------------|
| <b>CoFe-2@HP/CoNC</b>       | <b>1.512</b>             | <b>221.3</b>                                          | <b>760.7</b>                                                     | <b>450h-5</b><br><b>150h-10</b>                              | <b>This work</b>                                   |
| <b>Pt/C-IrO<sub>2</sub></b> | <b>1.420</b>             | <b>146.6</b>                                          | <b>657.3</b>                                                     | <b>80h-5</b>                                                 |                                                    |
| CuMo <sub>2</sub> ON@NG     | 1.438                    | 176.3                                                 | 736                                                              | 330h-10                                                      | Nano Energy 2021; 85:105987.                       |
| FeNi-SAs@NC                 | 1.54                     | 260                                                   | 950                                                              | 100h-20                                                      | Energy Storage Materials 2021; 35:723-730          |
| CoFe-LDH@CoFeNPs-N-CNTs     | 1.51                     | 116                                                   | 799                                                              | 100h-10                                                      | Small 2021; 17(44):2103737                         |
| Co-SAs/SNPs@NC              | 1.493                    | 223.5                                                 | 742                                                              | 720h-5                                                       | Advanced Functional Materials 2021; 31(45):2104735 |
| Fe/Ni(1:3)-NG               | 1.50                     | 164.1                                                 | 824.3                                                            | 120h-5                                                       | Carbon 2021; 185:526-535.                          |
| CoFe/NSC                    | 1.45                     | 162.74                                                | 776                                                              | 150h-5                                                       | Journal of Energy Chemistry 2021; 56:64-71         |
| ZOMC                        | 1.49                     | 221.1                                                 | 795.3                                                            | 150h-5                                                       | Advanced Materials 2020; 32(28):2002170            |
